# Supplementary material for: Cellular Robustness Conferred by Genetic Crosstalk Underlies Resistance against Chemotherapeutic Drug Doxorubicin in Fission Yeast
Source: PLOS journal article supplement (doi:10.1371/journal.pone.0055041), 2013-01-24
Supplement: S3 (10.1371/journal.pone.0055041.s003) [file journal.pone.0055041.s003]

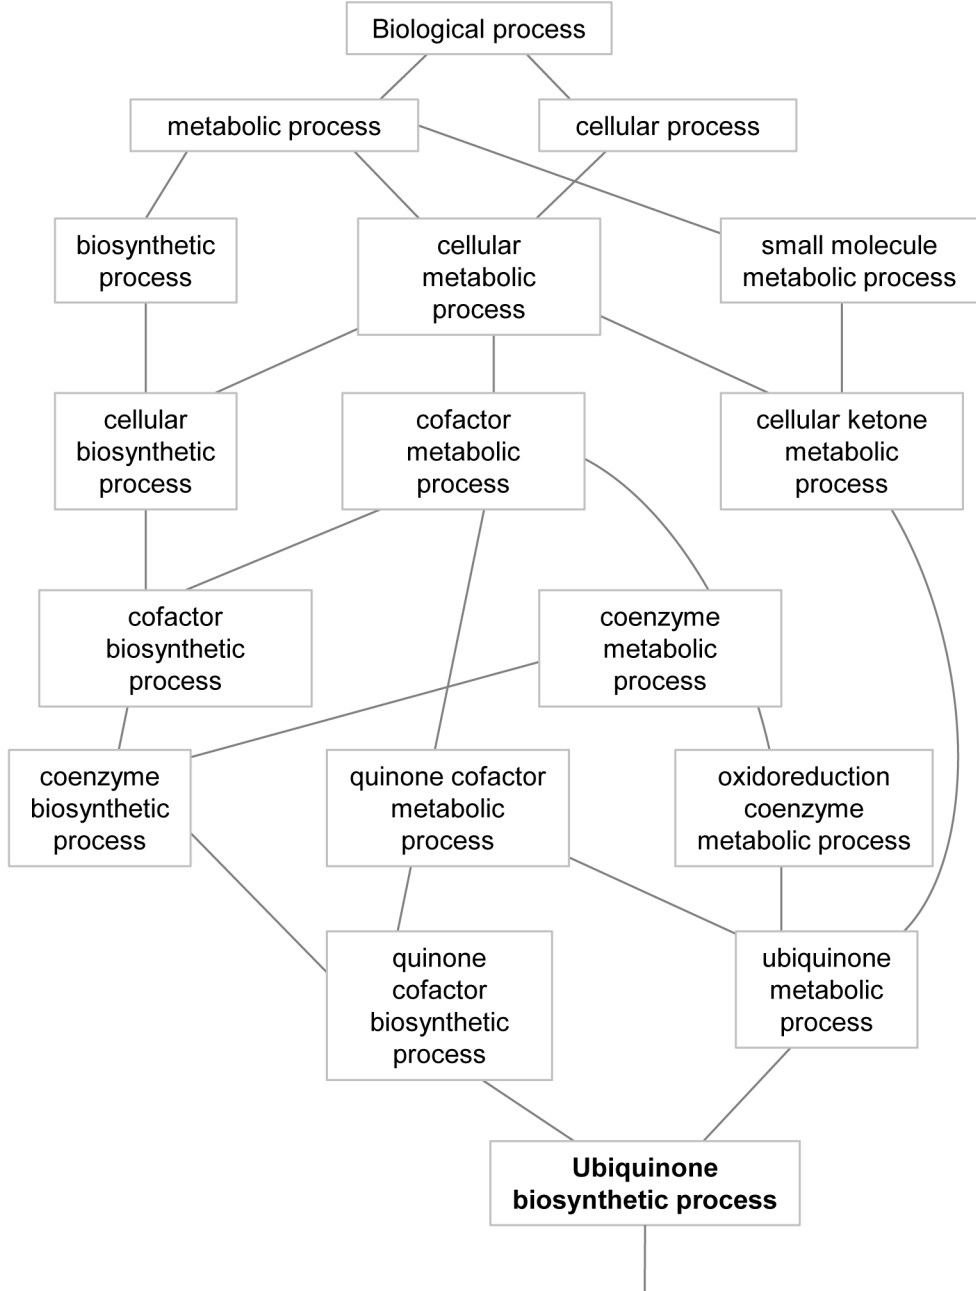

**Coq7 Coq4 Coq6 Coq2 Coq3 Dps1**
